# Supplementary material for: Immunoglobulin free light chains are biomarkers of poor prognosis in basal-like breast cancer and are potential targets in tumor-associated inflammation
Source: PubMed Central journal article supplement (PMC4102799; doi:10.18632/oncotarget.1868), 2014-03-26
Supplement: oncotarget-05-3159-s001.pdf [file oncotarget-05-3159-s001.pdf]

**Immunoglobulin free light chains are biomarkers of poor prognosis in basal-like breast cancer and are potential targets in tumor-associated inflammation**

*Supplementary results*

**Supplementary Table 1. FLC staining in biopsies of human malignant tissue in various organs compared to staining in tissue adjacent to the tumor and normal tissue.**

| <b>Breast</b>                                | <b>number</b> | <b>+++</b> | <b>++</b> | <b>+</b> | <b>-</b> |
|----------------------------------------------|---------------|------------|-----------|----------|----------|
| <b>Malignant</b>                             | 139           | 28         | 11        | 2        | 98       |
| <i>Metastatic carcinoma</i>                  | 26            | 6          | 4         |          | 16       |
| <i>Invasive ductal carcinoma</i>             | 65            | 17         | 5         | 2        | 41       |
| <i>Lobular carcinoma</i>                     | 20            | 1          | 1         |          | 18       |
| <i>Intraductal carcinoma</i>                 | 20            | 4          | 1         |          | 15       |
| <i>Squamous cell carcinoma</i>               | 4             |            |           |          | 4        |
| <i>Lobular carcinoma in situ</i>             | 4             |            |           |          | 4        |
| <b>Adjacent</b>                              | 8             |            |           |          | 8        |
| <b>Normal</b>                                | 8             |            |           |          | 8        |
| <hr/>                                        |               |            |           |          |          |
| <b>Pancreas</b>                              |               |            |           |          |          |
| <b>Malignant</b>                             | 107           | 20         | 9         | 1        | 77       |
| <i>Ductal adenocarcinoma</i>                 | 89            | 19         | 9         | 1        | 60       |
| <i>Adenosquamous carcinoma</i>               | 3             | 1          |           |          | 2        |
| <i>Islet cell tumor/carcinoma</i>            | 11            |            |           |          | 11       |
| <i>Metastatic carcinoma</i>                  | 4             |            |           |          | 4        |
| <b>Adjacent</b>                              | 23            | 1          |           |          | 22       |
| <b>Normal</b>                                | 20            |            |           |          | 20       |
| <hr/>                                        |               |            |           |          |          |
| <b>Lung</b>                                  |               |            |           |          |          |
| <b>Malignant</b>                             | 69            | 13         | 23        | 7        | 26       |
| <i>Adenocarcinoma</i>                        | 19            | 6          | 6         | 3        | 4        |
| <i>Alveolar carcinoma</i>                    | 1             |            | 1         |          |          |
| <i>Squamous cell carcinoma</i>               | 42            | 7          | 16        | 4        | 15       |
| <i>Small cell undifferentiated carcinoma</i> | 7             |            |           |          | 7        |
| <b>Adjacent</b>                              | 28            | 1          | 1         |          | 26       |
| <b>Normal</b>                                | 35            | 1          |           |          | 34       |
| <hr/>                                        |               |            |           |          |          |
| <b>Colon</b>                                 |               |            |           |          |          |
| <b>Malignant</b>                             | 58            | 24         | 7         |          | 27       |
| <i>Adenocarcinoma</i>                        | 18            | 4          | 4         |          | 10       |
| <i>Mucinous adenocarcinoma</i>               | 14            | 6          |           |          | 8        |
| <i>Carcinoid</i>                             | 2             | 1          |           |          | 1        |
| <i>Metastatic carcinoma</i>                  | 20            | 10         | 3         |          | 7        |

|                 |                          |   |   |   |   |
|-----------------|--------------------------|---|---|---|---|
|                 | <i>Papillary adenoma</i> | 4 | 3 |   | 1 |
| <b>Adjacent</b> |                          | 8 | 2 | 2 | 4 |
| <b>Normal</b>   |                          | 8 |   | 1 | 7 |

|                  |                                |    |    |   |   |    |
|------------------|--------------------------------|----|----|---|---|----|
| <b>Skin</b>      |                                |    |    |   |   |    |
| <b>Malignant</b> |                                | 65 | 26 | 5 | 4 | 30 |
|                  | <i>Squamous cell carcinoma</i> | 47 | 17 | 2 | 1 | 27 |
|                  | <i>Basal cell carcinoma</i>    | 11 | 6  | 2 | 1 | 2  |
|                  | <i>Melanoma</i>                | 7  | 3  | 1 | 2 | 1  |
| <b>Adjacent</b>  |                                | 14 | 2  | 1 |   | 11 |
| <b>Normal</b>    |                                | 8  |    |   |   | 8  |

|                  |                                    |      |    |   |   |      |
|------------------|------------------------------------|------|----|---|---|------|
| <b>Kidney</b>    |                                    |      |    |   |   |      |
| <b>Malignant</b> |                                    | 36   | 12 | 7 | 2 | 15   |
|                  | <i>Clear cell carcinoma</i>        | 11   | 4  | 2 | 1 | 4    |
|                  | <i>Granular cell carcinoma</i>     | 12   | 4  | 4 |   | 4    |
|                  | <i>Transitional cell carcinoma</i> | 20   | 4  | 1 | 1 | 7    |
| <b>Adjacent</b>  |                                    | n.d. |    |   |   | n.d. |
| <b>Normal</b>    |                                    | 8    |    |   |   | 8    |

n.d. not determined
